# Supplementary material
Source: publisher site journal article supplement (https://www.dovepress.com/article/552026)
Supplement: Supplementary file 1 [file 552026%20supplementary%20files.docx]

**Table S 1: Content validity and reliability of the study instrument (benchmarked values)**

| **Domain** | **Items (n)** | **I-CVI min** | **I-CVI max** | **S-CVI/Ave** | **Cronbach's α (KR-20)** | **Cronbach's α** | **ICC(2,1)** | **Pilot n** | **Retest interval (days)** | **Notes** |
| --- | --- | --- | --- | --- | --- | --- | --- | --- | --- | --- |
| Knowledge | 18 | 0.83 | 1 | 0.94 | 0.78 |  | 0.82 | 14 | 14 | Dichotomous items; α corresponds to KR-20 |
| Self-care | 20 | 0.85 | 1 | 0.95 |  | 0.88 | 0.88 | 14 | 14 | Likert 1–5 |
| Barriers | 12 | 0.83 | 0.95 | 0.92 | 0.74 |  | 0.79 | 14 | 14 | Dichotomous items; heterogeneous content |
| Overall | 50 |  |  |  |  | 0.9 | 0.86 | 14 | 14 | Aggregate scale |
